# Supplementary material for: Rho-Kinase Inhibitors for the Treatment of Refractory Diabetic Macular Oedema
Source: MDPI journal article supplement (doi:10.3390/cells10071683), 2021-07-03
Supplement: s1 [file s1]

[illegible]

**DMO**

[illegible]

[illegible]

|    |                     |      |                   |                                                                                                                                                                                                                                                                                                                |     |     |     |    |     |     |     |  |  |     |     |     |     |     |
|----|---------------------|------|-------------------|----------------------------------------------------------------------------------------------------------------------------------------------------------------------------------------------------------------------------------------------------------------------------------------------------------------|-----|-----|-----|----|-----|-----|-----|--|--|-----|-----|-----|-----|-----|
|    |                     |      |                   | Araújo, R.S.; Santos, D.F.; Silva, G.A. The Role of the Retinal Pigment Epithelium and Müller Cells Secretome in Neovascular Retinal Pathologies. <i>Biochimie</i> <b>2018</b> , <i>155</i> , 104–108, doi:10.1016/j.biochi.2018.06.019.                                                                       | Yes | Yes | Yes | CT | Yes | Yes | Yes |  |  |     |     |     |     |     |
| 19 | Araujo              | 2018 | Review            |                                                                                                                                                                                                                                                                                                                |     |     |     |    |     |     |     |  |  |     |     |     |     |     |
|    |                     |      |                   | Rizzolo, L.J. Development and Role of Tight Junctions in the Retinal Pigment Epithelium. <i>International Review of Cytology</i> <b>2007</b> , <i>258</i> , 195–234, doi:10.1016/S0074-7696(07)58004-6.                                                                                                        | Yes | Yes | Yes | CT | Yes | Yes | Yes |  |  |     |     |     |     |     |
| 20 | Rizzolo             | 2007 | Review            |                                                                                                                                                                                                                                                                                                                |     |     |     |    |     |     |     |  |  |     |     |     |     |     |
|    |                     |      |                   | Omri, S.; Omri, B.; Savoldelli, M.; Jonet, L.; Thillaye-Goldenberg, B.; Thuret, G.; Gain, P.; Jeanny, J.C.; Crisanti, P.; Behar-Cohen, F. The Outer Limiting Membrane (OLM) Revisited: Clinical Implications. <i>Clinical Ophthalmology</i> <b>2010</b> , <i>4</i> , 183–195, doi:10.2147/opth.s5901.          | Yes | Yes |     |    |     |     |     |  |  |     |     |     |     |     |
| 21 | Omri                | 2010 | Preclinical trial |                                                                                                                                                                                                                                                                                                                |     |     |     |    |     |     |     |  |  | Yes | Yes | Yes | Yes | Yes |
|    |                     |      |                   | Sacconi, R.; Giuffrè, C.; Corbelli, E.; Borrelli, E.; Querques, G.; Bandello, F. Emerging Therapies in the Management of Macular Edema: A Review. <i>F1000Res</i> . 2019 Aug 12;8:F1000 Faculty Rev-1413. doi: 10.12688/f1000research.19198.1.                                                                 | Yes | Yes | Yes | CT | Yes | Yes | Yes |  |  |     |     |     |     |     |
| 22 | Sacconi             | 2019 | Review            |                                                                                                                                                                                                                                                                                                                |     |     |     |    |     |     |     |  |  |     |     |     |     |     |
|    |                     |      |                   | Miller, J.W.; le Couter, J.; Strauss, E.C.; Ferrara, N. Vascular Endothelial Growth Factor a in Intraocular Vascular Disease. <i>Ophthalmology</i> <b>2013</b> , <i>120</i> , 106–114, doi:10.1016/j.opth.2012.07.038.                                                                                         | Yes | Yes | Yes | CT | Yes | Yes | Yes |  |  |     |     |     |     |     |
| 23 | Miller              | 2013 | Review            |                                                                                                                                                                                                                                                                                                                |     |     |     |    |     |     |     |  |  |     |     |     |     |     |
|    |                     |      |                   | Sodhi, A.; Ma, T.; Mervon, D.; Deshpande, M.; Jee, K.; Dinabandhu, A.; Vancel, J.; Lu, D.; Montaner, S. Angiopoietin-like 4 Binds Neuropilins and Cooperates with VEGF to Induce Diabetic Macular Edema. <i>Journal of Clinical Investigation</i> <b>2019</b> , <i>129</i> , 4593–4608, doi:10.1172/JCI120879. | Yes | Yes |     |    |     |     |     |  |  |     |     |     |     |     |
| 24 | Sodhi               | 2019 | Preclinical trial |                                                                                                                                                                                                                                                                                                                |     |     |     |    |     |     |     |  |  | Yes | Yes | Yes | Yes | Yes |
|    |                     |      |                   | Fogli, S.; Mogavero, S.; Egan, C.G.; del Re, M.; Danesi, R. Pathophysiology and Pharmacological Targets of VEGF in Diabetic Macular Edema. <i>Pharmacological Research</i> <b>2016</b> , <i>103</i> , 149–157, doi:10.1016/j.phrs.2015.11.003.                                                                 | Yes | Yes | Yes | CT | Yes | Yes | Yes |  |  |     |     |     |     |     |
| 25 | Fogli               | 2016 | Review            |                                                                                                                                                                                                                                                                                                                |     |     |     |    |     |     |     |  |  |     |     |     |     |     |
|    |                     |      |                   | Rizzolo, L.J.; Peng, S.; Luo, Y.; Xiao, W. Integration of Tight Junctions and Claudins with the Barrier Functions of the Retinal Pigment Epithelium. <i>Progress in Retinal and Eye Research</i> 2011, <i>30</i> , 296–323.                                                                                    | Yes | Yes | Yes | CT | Yes | Yes | Yes |  |  |     |     |     |     |     |
| 26 | Rizzolo             | 2011 | Review            |                                                                                                                                                                                                                                                                                                                |     |     |     |    |     |     |     |  |  |     |     |     |     |     |
|    |                     |      |                   | Beranova-Giorgianni, S.; Giorgianni, F. Proteomics of Human Retinal Pigment Epithelium (RPE) Cells. <i>Proteomes</i> <b>2018</b> , <i>6</i> , 22, doi:10.3390/proteomes6020022.                                                                                                                                | Yes | Yes | Yes | CT | Yes | Yes | Yes |  |  |     |     |     |     |     |
| 27 | Beranova-Giorgianni | 2018 | Review            |                                                                                                                                                                                                                                                                                                                |     |     |     |    |     |     |     |  |  |     |     |     |     |     |
|    |                     |      |                   | Ponnalagu, M.; Subramani, M.; Jayadev, C.; Shetty, R.; Das, D. Retinal Pigment Epithelium-Secretome: A Diabetic Retinopathy Perspective. <i>Cytokine</i> 2017, <i>95</i> , 126–135.                                                                                                                            | Yes | Yes | Yes | CT | Yes | Yes | Yes |  |  |     |     |     |     |     |
| 28 | Ponnalagu           | 2017 | Review            |                                                                                                                                                                                                                                                                                                                |     |     |     |    |     |     |     |  |  |     |     |     |     |     |

[illegible]

|    |              |      |                  |                                                                                                                                                                                                                                                                                                                                                      |     |     |     |    |     |     |     |     |     |     |     |     |
|----|--------------|------|------------------|------------------------------------------------------------------------------------------------------------------------------------------------------------------------------------------------------------------------------------------------------------------------------------------------------------------------------------------------------|-----|-----|-----|----|-----|-----|-----|-----|-----|-----|-----|-----|
| 39 | Cunha-Vaz    | 2014 | Review           | Cunha-Vaz, J.; Ribeiro, L.; Lobo, C. Phenotypes and Biomarkers of Diabetic Retinopathy. <i>Progress in Retinal and Eye Research</i> 2014, 41, 90–111. doi: 10.1016/j.preteyeres.2014.03.003                                                                                                                                                          | Yes | Yes | Yes | CT | Yes | Yes | Yes |     |     |     |     |     |
| 40 | Al-Shabrawey | 2008 | Precinical trial | Al-Shabrawey, M.; Rojas, M.; Sanders, T.; Behzadian, A.; El-Remessy, A.; Bartoli, M.; Parpia, A.K.; Liou, G.; Caldwell, R.B. Role of NADPH Oxidase in Retinal Vascular Inflammation. <i>Investigative Ophthalmology and Visual Science</i> 2008, 49, 3239–3244, doi:10.1167/iov.08-1755.                                                             | Yes | Yes |     |    |     |     |     | Yes | Yes | Yes | Yes | Yes |
| 41 | Li           | 2012 | Precinical trial | Li, X.; Cai, Y.; Wang, Y.-S.; Shi, Y.-Y.; Hou, W.; Xu, C.-S.; Wang, H.-Y.; Ye, Z.; Yao, L.-B.; Zhang, J. Hyperglycaemia Exacerbates Choroidal Neovascularisation in Mice via the Oxidative Stress-Induced Activation of STAT3 Signalling in RPE Cells. <i>PLoS ONE</i> 2012, 7, e47600. doi:10.1371/journal.pone.0047600.                            | Yes | Yes |     |    |     |     |     | Yes | Yes | Yes | Yes | Yes |
| 42 | Huang        | 2011 | Precinical trial | Huang, H.; Gandhi, J.K.; Zhong, X.; Wei, Y.; Gong, J.; Duh, E.J.; Vinore, S.A. TNF $\alpha$ Is Required for Late BRB Breakdown in Diabetic Retinopathy, and Its Inhibition Prevents Leukostasis and Protects Vessels and Neurons from Apoptosis. <i>Investigative Ophthalmology and Visual Science</i> 2011, 52, 1336–1344, doi:10.1167/iov.10-5768. | Yes | Yes |     |    |     |     |     | Yes | Yes | Yes | Yes | Yes |
| 43 | Zur          | 2019 | Review           | Zur, D.; Iglicki, M.; Loewenstein, A. The Role of Steroids in the Management of Diabetic Macular Edema. <i>Ophthalmic Research</i> 2019, 62, 231–236, doi: 10.1159/000499540                                                                                                                                                                         | Yes | Yes | Yes | CT | Yes | Yes | Yes |     |     |     |     |     |
| 44 | Chawan-Saad  | 2019 | Review           | Chawan-Saad, J.; Wu, M.; Wu, A.; Wu, L. Corticosteroids for Diabetic Macular Edema. <i>Taiwan Journal of Ophthalmology</i> 2019, 9, 233–242.                                                                                                                                                                                                         | Yes | Yes | Yes | CT | Yes | Yes | Yes |     |     |     |     |     |
| 45 | Monickaraj   | 2016 | Precinical trial | Monickaraj, F.; McGuire, P.G.; Franco Nitta, C.; Ghosh, K.; Das, A. Cathepsin D: An $\alpha$ -M $\mu$ -Derived Factor Mediating Increased Endothelial Cell Permeability with Implications for Alteration of the Blood-Retinal Barrier in Diabetic Retinopathy. <i>FASEB Journal</i> 2016, 30, 1670–1682, doi:10.1096/fj.15-279802.                   | Yes | Yes |     |    |     |     |     | Yes | Yes | Yes | Yes | Yes |
| 46 | Hussain      | 2019 | Review           | Hussain, R.M.; Neiveem, A.E.; Kansara, V.; Harris, A.; Ciulla, T.A. Tie-2/Angiopoietin Pathway Modulation as a Therapeutic Strategy for Retinal Disease. <i>Expert Opinion on Investigational Drugs</i> 2019, 28, 861–869.                                                                                                                           | Yes | Yes | Yes | CT | Yes | Yes | Yes |     |     |     |     |     |
| 47 | Jousseaume   | 2001 | Precinical trial | Jousseaume, A.M.; Murata, T.; Tsujikawa, A.; Kirchhof, B.; Bursell, S.E.; Adamis, A.P. Leukocyte-Mediated Endothelial Cell Injury and Death in the Diabetic Retina. <i>American Journal of Pathology</i> 2001, 155, 147–152. doi:10.1016/S0002-9440(10)63952-1.                                                                                      | Yes | Yes |     |    |     |     |     | Yes | Yes | Yes | Yes | Yes |
| 48 | Ciulla       | 2003 | Review           | Ciulla, T.A.; Amador, A.G.; Zinman, B. <i>Diabetic Retinopathy and Diabetic Macular Edema Pathophysiology, Screening, and Novel Therapies</i> ; 2003;                                                                                                                                                                                                | Yes | Yes | Yes | CT | Yes | Yes | Yes |     |     |     |     |     |

|    |           |      |                                 |                                                                                                                                                                                                                                                                                                                                                                                                                                                           |     |     |     |     |  |     |     |     |  |  |  |  |  |  |     |     |     |     |     |
|----|-----------|------|---------------------------------|-----------------------------------------------------------------------------------------------------------------------------------------------------------------------------------------------------------------------------------------------------------------------------------------------------------------------------------------------------------------------------------------------------------------------------------------------------------|-----|-----|-----|-----|--|-----|-----|-----|--|--|--|--|--|--|-----|-----|-----|-----|-----|
| 49 | Joussem   | 2004 | Preclinical trial               | Joussem, A.M.; Poulaki, V.; Le, M.L.; Koizumi, K.; Esser, C.; Janicki, H.; Schraermeyer, U.; Kociok, N.; Fauser, S.; Kirchhof, B.; et al. A Central Role for Inflammation in the Pathogenesis of Diabetic Retinopathy. <i>The FASEB Journal</i> <b>2004</b> , <i>18</i> , 1450–1452. doi:10.1096/fj.03-1476fje.                                                                                                                                           | Yes | Yes |     |     |  |     |     |     |  |  |  |  |  |  | Yes | Yes | Yes | Yes | Yes |
| 50 | Bressler  | 2018 | RCT                             | Bressler, N.M.; Beaulieu, W.T.; Glassman, A.R.; Blinder, K.J.; Bressler, S.B.; Jampol, L.M.; Melia, M.; Wells, J.A. Persistent Macular Thickening Following Intravitreal Aflibercept, Bevacizumab, or Ranibizumab for Central-Invololved Diabetic Macular Edema with Vision Impairment: A Secondary Analysis of a Randomized Clinical Trial. In Proceedings of the JAMA Ophthalmology; American Medical Association, March 1 2018; Vol. 136, pp. 257–269. | Yes | Yes |     |     |  |     |     |     |  |  |  |  |  |  | Yes | Yes |     |     |     |
| 51 | Iglicki   | 2019 | Comparative retrospective study | Iglicki, M.; Busch, C.; Zur, D.; Okada, M.; Mariussi, M.; Chhablani, J.K.; Cebeci, Z.; Fraser-Bell, S.; Chaikittmongkol, V.; Couturier, A.; et al. Dexamethasone Implant for Diabetic Macular Edema in Naive Compared with Refractory Eyes: The International Retina Group Real-Life 24-Month Multicenter Study: The Irgrel-Dex Study. <i>Retina</i> <b>2019</b> , <i>39</i> , 44–51, doi:10.1097/IAE.0000000000002196.                                   | Yes | Yes |     |     |  |     |     |     |  |  |  |  |  |  | Yes | Yes | Yes | Yes | Yes |
| 52 | Maturi    | 2017 | Review                          | Shah, S.U.; Maturi, R.K. Therapeutic Options in Refractory Diabetic Macular Oedema. <i>Drugs</i> <b>2017</b> , <i>77</i> , 481–492, doi:10.1007/s40265-017-0704-6.                                                                                                                                                                                                                                                                                        | Yes | Yes | Yes | CT  |  | Yes | Yes | Yes |  |  |  |  |  |  |     |     |     |     |     |
| 53 | Virgili   | 2018 | Meta-analysis                   | Virgili, G.; Parravano, M.; Evans, J.R.; Gordon, I.; Lucenteforte, E. Anti-Vascular Endothelial Growth Factor for Diabetic Macular Oedema: A Network Meta-Analysis. <i>Cochrane Database of Systematic Reviews</i> <b>2018</b> , <i>2018</i> .                                                                                                                                                                                                            | Yes | Yes | Yes | Yes |  | Yes | Yes | Yes |  |  |  |  |  |  |     |     |     |     |     |
| 54 | The DRCRN | 2015 | RCT                             | Aflibercept, Bevacizumab, or Ranibizumab for Diabetic Macular Edema. <i>New England Journal of Medicine</i> <b>2015</b> , <i>372</i> , 1193–1203, doi:10.1056/nejmoa1414264.                                                                                                                                                                                                                                                                              | Yes | Yes |     |     |  |     |     |     |  |  |  |  |  |  | Yes | Yes | Yes | Yes | Yes |
| 55 | Karst     | 2019 | Descriptive retrospective study | Karst, S.G.; Schuster, M.; Mitsch, C.; Meyer, E.L.; Kundi, M.; Scholda, C.; Schmidt-Erfurth, U.M. Atrophy of the Central Neuroretina in Patients Treated for Diabetic Macular Edema. <i>Acta Ophthalmologica</i> <b>2019</b> , <i>97</i> , e1054–e1061, doi:10.1111/aos.14173.                                                                                                                                                                            | Yes | Yes |     |     |  |     |     |     |  |  |  |  |  |  |     |     | Yes | Yes | Yes |
| 56 | Willmann  | 2017 | Comparative retrospective study | Willmann, G.; Nepomuceno, A.B.; Messias, K.; Barroso, L.; Scott, I.U.; Messias, A.; Jorge, R. Foveal Thickness Reduction after Anti-Vascular Endothelial Growth Factor Treatment in Chronic Diabetic Macular Edema. <i>International Journal of Ophthalmology</i> <b>2017</b> , <i>10</i> , 760–764, doi:10.18240/ijo.2017.05.17.                                                                                                                         | Yes | Yes |     |     |  |     |     |     |  |  |  |  |  |  | Yes | Yes | Yes | Yes | Yes |

[illegible]

|      |             |      |                   |                                                                                                                                                                                                                                                                                                                                                                                                         |     |     |     |     |     |     |     |     |     |     |     |
|------|-------------|------|-------------------|---------------------------------------------------------------------------------------------------------------------------------------------------------------------------------------------------------------------------------------------------------------------------------------------------------------------------------------------------------------------------------------------------------|-----|-----|-----|-----|-----|-----|-----|-----|-----|-----|-----|
|      |             |      |                   | Mehta, H.; Hennipin, C.; Gillies, M.C.; Nguyen, V.; Campain, A.; Fraser-Bell, S. Anti-Vascular Endothelial Growth Factor Combined with Intravitreal Steroids for Diabetic Macular Oedema. <i>Cochrane Database of Systematic Reviews</i> 2018, 2018, doi:10.1002/14651858.CD011599.pub2.                                                                                                                | Yes |     |     |     |     |
| 65   | Mehta       | 2018 | Systematic Review | Boyer, D.S.; Yoon, Y.H.; Belfort, R.; Bandello, F.; Maturi, R.K.; Augustin, A.J.; Li, X.Y.; Cui, H.; Hashad, Y.; Whitcup, S.M. Three-Year, Randomized, Sham-Controlled Trial of Dexamethasone Intravitreal Implant in Patients with Diabetic Macular Edema. <i>Ophthalmology</i> 2014, 121, 1904–1914, doi:10.1016/j.optha.2014.04.024.                                                                 | Yes | Yes |     |     |     |     |     |     |     |     |     |
| 66   | Boyer       | 2014 | RCT               | Maturi, R.K.; Glassman, A.R.; Liu, D.; Beck, R.W.; Bhavsar, A.R.; Bressler, N.M.; Jampol, L.M.; Melia, M.; Punjabi, O.S.; Salehi-Had, H.; et al. Effect of Adding Dexamethasone to Continued Ranibizumab Treatment in Patients with Persistent Diabetic Macular Edema: A DRCK Network Phase 2 Randomized Clinical Trial. <i>JAMA Ophthalmology</i> 2018, 136, 29–38, doi:10.1001/jamaophthol.2017.4914. | Yes | Yes |     |     |     |     | Yes | Yes | Yes | Yes | Yes |
| 67   | Maturi      | 2017 | RCT               | Stefánsson, E. The Therapeutic Effects of Retinal Laser Treatment and Vitrectomy. A Theory Based on Oxygen and Vascular Physiology. <i>Acta Ophthalmologica Scandinavica</i> 2001, 79, 435–440.                                                                                                                                                                                                         | Yes | Yes |     |     |     |     | Yes | Yes | Yes | Yes | Yes |
| 68   | Stefánsson  | 2001 | Review            | Chin, H.S.; Park, T.S.; Moon, Y.S.; Oh, J.H. Difference in Clearance of Intravitreal Triamcinolone Acetonide between Vitrectomized and Nonvitrectomized Eyes. <i>Retina</i> 2005, 25, 556–560, doi:10.1097/00006982-200507000-00002.                                                                                                                                                                    | Yes | Yes | Yes | CT  | Yes | Yes | Yes |     |     |     |     |
| 69   | Chin        | 2005 | Preclinical trial | Yau, J.W.Y.; Rogers, S.L.; Kawasaki, R.; Lamoureux, E.L.; Kowalski, J.W.; Bek, T.; Chen, S.J.; Dekker, J.M.; Fletcher, A.; Grauslund, J.; et al. Global Prevalence and Major Risk Factors of Diabetic Retinopathy. <i>Diabetes Care</i> 2012, 35, 556–564, doi:10.2337/dc11-1909.                                                                                                                       | Yes | Yes |     |     |     |     |     |     |     |     |     |
| 70   | Yau         | 2012 | Systematic Review | Ruiz-Loredo, A.Y.; López, E.; López-Colomé, A.M. Thrombin Promotes Actin Stress Fiber Formation in RPE through Rho/ROCK-Mediated MLC Phosphorylation. <i>Journal of Cellular Physiology</i> 2011, 226, 414–423, doi:10.1002/jcp.22347.                                                                                                                                                                  | Yes |     |     |     |     |
| ROCK |             |      |                   |                                                                                                                                                                                                                                                                                                                                                                                                         |     |     |     |     |     |     |     |     |     |     |     |
| 71   | Ruiz-Loredo | 2011 | Preclinical trial | Jahani, V.; Kavousi, A.; Mehri, S.; Karimi, G. Rho Kinase, a Potential Target in the Treatment of Metabolic Syndrome. <i>Biomedicine and Pharmacotherapy</i> 2018, 106, 1024–1030.                                                                                                                                                                                                                      | Yes | Yes |     |     |     |     |     |     |     |     |     |
| 72   | Jahani      | 2018 | Review            |                                                                                                                                                                                                                                                                                                                                                                                                         | Yes | Yes | Yes | CT  | Yes | Yes | Yes |     |     |     |     |



[illegible]

[illegible]

|     |            |      |                   |                                                                                                                                                                                                                                                                                                                                                                                    |     |     |  |  |  |     |     |     |     |     |
|-----|------------|------|-------------------|------------------------------------------------------------------------------------------------------------------------------------------------------------------------------------------------------------------------------------------------------------------------------------------------------------------------------------------------------------------------------------|-----|-----|--|--|--|-----|-----|-----|-----|-----|
|     |            |      |                   | Bryan, B.A.; Dennstedt, E.; Mitchell, D.C.; Walshe, T.E.; Noma, K.; Loureiro, R.; Saint-Geniez, M.; Campaigniac, J.; Liao, J.K.; Patricia, D.A. RhoA/ROCK Signalling Is Essential for Multiple Aspects of VEGF-mediated Angiogenesis. <i>The FASEB Journal</i> <b>2010</b> , <i>24</i> , 3186–3195, doi:10.1096/fj.09-145102.                                                      |     |     |  |  |  |     |     |     |     |     |
| 92  | Bryan      | 2010 | Preclinical trial |                                                                                                                                                                                                                                                                                                                                                                                    | Yes | Yes |  |  |  | Yes | Yes | Yes | Yes | Yes |
|     |            |      |                   | Zhang, X.H.; Feng, Z.H.; Wang, X.Y. The ROCK Pathway Inhibitor Y-27632 Mitigates Hypoxia and Oxidative Stress-Induced Injury to Retinal Muller Cells. <i>Neural Regeneration Research</i> <b>2018</b> , <i>13</i> , 549–555, doi:10.4103/1673-5374.228761.                                                                                                                         | Yes | Yes |  |  |  | Yes | Yes | Yes | Yes | Yes |
| 93  | Zhang      | 2018 | Preclinical trial |                                                                                                                                                                                                                                                                                                                                                                                    | Yes | Yes |  |  |  | Yes | Yes | Yes | Yes | Yes |
|     |            |      |                   | Yokota, T.; Utsunomiya, K.; Taniguchi, K.; Gojo, A.; Kurata, H.; Tajima, N. Involvement of the Rho/Rho Kinase Signalling Pathway in Platelet-Derived Growth Factor BB-Induced Vascular Endothelial Growth Factor Expression in Diabetic Rat Retina. <i>Japanese Journal of Ophthalmology</i> <b>2007</b> , <i>51</i> , 424–430, doi:10.1007/s10384-007-0471-0.                     | Yes | Yes |  |  |  | Yes | Yes | Yes | Yes | Yes |
| 94  | Yokota     | 2007 | Preclinical trial |                                                                                                                                                                                                                                                                                                                                                                                    | Yes | Yes |  |  |  | Yes | Yes | Yes | Yes | Yes |
|     |            |      |                   | Rothschild, P.R.; Salah, S.; Berdugo, M.; Gélizé, E.; Delaunay, K.; Naud, M.C.; Klein, C.; Moulin, A.; Savoldelli, M.; Bergin, C.; et al. ROCK-1 Mediates Diabetes-Induced Retinal Pigment Epithelial and Endothelial Cell Blebbing: Contribution to Diabetic Retinopathy. <i>Scientific Reports</i> <b>2017</b> , <i>7</i> , 1–15, doi:10.1038/s41598-017-07329-y.                | Yes | Yes |  |  |  | Yes | Yes | Yes | Yes | Yes |
| 95  | Rothschild | 2017 | Preclinical trial |                                                                                                                                                                                                                                                                                                                                                                                    | Yes | Yes |  |  |  | Yes | Yes | Yes | Yes | Yes |
|     |            |      |                   | Arita, R.; Hata, Y.; Nakao, S.; Kita, T.; Miura, M.; Kawahara, S.; Zandi, S.; Almulki, L.; Tayyari, F.; Shimokawa, H.; et al. Rho Kinase Inhibition by Fasudil Ameliorates Diabetes-Induced Microvascular Damage. <i>Diabetes</i> <b>2009</b> , <i>58</i> , 215–226, doi:10.2337/db08-0762.                                                                                        | Yes | Yes |  |  |  | Yes | Yes | Yes | Yes | Yes |
| 96  | Arita      | 2009 | Preclinical trial |                                                                                                                                                                                                                                                                                                                                                                                    | Yes | Yes |  |  |  | Yes | Yes | Yes | Yes | Yes |
|     |            |      |                   | Chen, Y.L.; Ren, Y.; Xu, W.; Rosa, R.H.; Kuo, L.; Hein, T.W. Constriction of Retinal Venules to Endothelin-1: Obligatory Roles of ET A Receptors, Extracellular Calcium Entry, and Rho Kinase. <i>Investigative Ophthalmology and Visual Science</i> <b>2018</b> , <i>59</i> , 5167–5175, doi:10.1167/iovs.18-25369.                                                               | Yes | Yes |  |  |  | Yes | Yes | Yes | Yes | Yes |
| 97  | Chen       | 2018 | Preclinical trial |                                                                                                                                                                                                                                                                                                                                                                                    | Yes | Yes |  |  |  | Yes | Yes | Yes | Yes | Yes |
|     |            |      |                   | Rosa, R.H. Divergent Roles of Nitric Oxide and Rho Kinase in Vasomotor Regulation of Human Retinal Arterioles. <b>2009</b> , doi:10.1167/iovs.09-4391.                                                                                                                                                                                                                             | Yes | Yes |  |  |  | Yes | Yes | Yes | Yes | Yes |
| 98  | Rosa       | 2009 | Preclinical trial |                                                                                                                                                                                                                                                                                                                                                                                    | Yes | Yes |  |  |  | Yes | Yes | Yes | Yes | Yes |
|     |            |      |                   | Yamaguchi, M.; Nakao, S.; Arita, R.; Kaizu, Y.; Arima, M.; Zhou, Y.; Kita, T.; Yoshida, S.; Kimura, K.; Isobe, T.; et al. Vascular Normalization by ROCK Inhibitor: Therapeutic Potential of Ripasudil (K-115) Eye Drop in Retinal Angiogenesis and Hypoxia. <i>Investigative Ophthalmology and Visual Science</i> <b>2016</b> , <i>57</i> , 2264–2276, doi:10.1167/iovs.15-17411. | Yes | Yes |  |  |  | Yes | Yes | Yes | Yes | Yes |
| 99  | Yamaguchi  | 2016 | Preclinical trial |                                                                                                                                                                                                                                                                                                                                                                                    | Yes | Yes |  |  |  | Yes | Yes | Yes | Yes | Yes |
|     |            |      |                   | Nagaoka, T.; Hein, T.W.; Yoshida, A.; Kuo, L. Simvastatin Elicits Dilatation of Isolated Porcine Retinal Arterioles: Role of Nitric Oxide and Mevalonate-Rho Kinase Pathways., doi:10.1167/iovs.06-0856.                                                                                                                                                                           | Yes | Yes |  |  |  | Yes | Yes | Yes | Yes | Yes |
| 100 | Nagaoka    | 2007 | Preclinical trial |                                                                                                                                                                                                                                                                                                                                                                                    | Yes | Yes |  |  |  | Yes | Yes | Yes | Yes | Yes |

|     |               |      |                                       |                                                                                                                                                                                                                                                                                                                                                                    |     |     |     |     |     |     |     |     |     |     |     |     |     |
|-----|---------------|------|---------------------------------------|--------------------------------------------------------------------------------------------------------------------------------------------------------------------------------------------------------------------------------------------------------------------------------------------------------------------------------------------------------------------|-----|-----|-----|-----|-----|-----|-----|-----|-----|-----|-----|-----|-----|
| 101 | Fagerholm     | 2019 | Review                                | Fagerholm, S.C.; Guenther, C.; Asens, M.L.; Savinko, T.; Uotila, L.M. Beta2-Integrins and Interacting Proteins in Leukocyte Trafficking, Immune Suppression, and Immunodeficiency Disease. <i>Frontiers in Immunology</i> <b>2019</b> , <i>10</i> , 1–10, doi:10.3389/fimmu.2019.00254.                                                                            | Yes | Yes | Yes | CT  | Yes | Yes | Yes |     |     |     |     |     |     |
| 102 | Barreiro      | 2002 | Preclinical trial                     | Barreiro, O.; Yáñez-Mó, M.; Serrador, J.M.; Montoya, M.C.; Vicente-Manzanares, M.; Tejedor, R.; Furthmayr, H.; Sánchez-Madrid, F. Dynamic Interaction of VCAM-1 and ICAM-1 with Moesin and Ezrin in a Novel Endothelial Docking Structure for Adherent Leukocytes. <i>Journal of Cell Biology</i> <b>2002</b> , <i>157</i> , 1233–1245, doi:10.1083/jcb.200112126. | Yes | Yes |     |     |     |     |     |     | Yes | Yes | Yes | Yes | Yes |
| 103 | Nourinia      | 2013 | RCT                                   | Nourinia, R.; Ahmadiéh, H.; Shahheidari, M.H.; Zandi, S.; Nakao, S.; Hafezi-Moghadam, A. Intravitreal Fasudil Combined with Bevacizumab for Treatment of Refractory Diabetic Macular Edema; a Pilot Study. <i>Journal of Ophthalmic and Vision Research</i> <b>2013</b> , <i>8</i> , 337–340.                                                                      | Yes | Yes |     |     |     |     |     | Yes | Yes | Yes | Yes | Yes |     |
| 104 | Ahmadiéh      | 2013 | Prospective interventional case serie | Ahmadiéh, H.; Nourinia, R.; Hafezi-Moghadam, A. Intravitreal Fasudil Combined with Bevacizumab for Persistent Diabetic Macular Edema: A Novel Treatment. <i>JAMA Ophthalmology</i> <b>2013</b> , <i>131</i> , 923–924, doi:10.1001/jamaophthalmol.2013.143.                                                                                                        | Yes | Yes |     |     |     |     |     |     |     |     | Yes | Yes | Yes |
| 105 | Van-Linden    | 2014 | Review                                | van Linden, O.P.J.; Kooistra, A.J.; Leurs, R.; de Esch, I.J.P.; de Graaf, C. KLIFS: A Knowledge-Based Structural Database to Navigate Kinase-Ligand Interaction Space. <i>Journal of Medicinal Chemistry</i> <b>2014</b> , <i>57</i> , 249–277.                                                                                                                    | Yes |     |
| 106 | Zhao          | 2014 | Review                                | Zhao, Z.; Wu, H.; Wang, L.; Liu, Y.; Knapp, S.; Liu, Q.; Gray, N.S. Exploration of Type II Binding Mode: A Privileged Approach for Kinase Inhibitor Focused Drug Discovery? <i>ACS Chemical Biology</i> <b>2014</b> , <i>9</i> , 1230–1241.                                                                                                                        | Yes | Yes | Yes | CT  | Yes | Yes | Yes |     |     |     |     |     |     |
| 107 | Tanna         | 2018 | Review                                | Tanna, A.P.; Johnson, M. Rho Kinase Inhibitors as a Novel Treatment for Glaucoma and Ocular Hypertension. <i>Ophthalmology</i> <b>2018</b> , <i>125</i> , 1741–1756.                                                                                                                                                                                               | Yes | Yes | Yes | CT  | Yes | Yes | Yes |     |     |     |     |     |     |
| 108 | Hoy           | 2018 | Review                                | Hoy, S.M. Netarsudil Ophthalmic Solution 0.02%: First Global Approval. <i>Drugs</i> <b>2018</b> , <i>78</i> , 389–396, doi:10.1007/s40265-018-0877-7.                                                                                                                                                                                                              | Yes | Yes | Yes | CT  | Yes | Yes | Yes |     |     |     |     |     |     |
| 109 | Jagasia       | 2021 | CT (Phase IIa)                        | Jagasia, M.; Lazaryan, A.; Bachier, C.R.; Salhotra, A.; Weisdorf, D.J.; Zoghi, B.; Essell, J.; Green, L.; Schueller, O.; Patel, J.; et al. ROCK2 Inhibition With Belumosudil (KD025) for the Treatment of Chronic Graft-Versus-Host Disease. <i>Journal of Clinical Oncology</i> <b>2021</b> , JCO.20.02754, doi:10.1200/jco.20.02754.                             | Yes | Yes |     |     |     |     |     |     | Yes | Yes | Yes | Yes | Yes |
| 110 | Garnock-Jones | 2014 | Review                                | Garnock-Jones, K.P. Ripasudil: First Global Approval. <i>Drugs</i> <b>2014</b> , <i>74</i> , 2211–2215, doi:10.1007/s40265-014-0333-2.                                                                                                                                                                                                                             | Yes | Yes | Yes | CT  | Yes | Yes | Yes |     |     |     |     |     |     |

|     |             |      |                                       |                                                                                                                                                                                                                                                                                                                                                                                                                                   |  |  |  |     |     |     |    |     |     |     |     |     |     |     |     |
|-----|-------------|------|---------------------------------------|-----------------------------------------------------------------------------------------------------------------------------------------------------------------------------------------------------------------------------------------------------------------------------------------------------------------------------------------------------------------------------------------------------------------------------------|--|--|--|-----|-----|-----|----|-----|-----|-----|-----|-----|-----|-----|-----|
| 111 | Nakabayashi | 2015 | Precinical trial                      | Nakabayashi, S.; Kawai, M.; Yoshioka, T.; Song, Y.S.; Tani, T.; Yoshida, A.; Nagaoka, T. Effect of Intravitreal Rho Kinase Inhibitor Ripasudil (K-115) on Feline Retinal Microcirculation. <i>Experimental Eye Research</i> <b>2015</b> , <i>139</i> , 132–135, doi:10.1016/j.exer.2015.07.008.                                                                                                                                   |  |  |  | Yes | Yes |     |    |     |     |     | Yes | Yes | Yes | Yes | Yes |
| 112 | Pakravan    | 2016 | Prospective Interventional case serie | Pakravan, M.; Beni, A.N.; Ghahari, E.; Varshochian, R.; Yazdani, S.; Esfandiari, H.; Ahmadiieh, H. The Ocular Hypotensive Efficacy of Topical Fasudil, a Rho-Associated Protein Kinase Inhibitor, in Patients with End-Stage Glaucoma. <i>American Journal of Therapeutics</i> <b>2016</b> , <i>24</i> , E676–E680, doi:10.1097/MJT.0000000000000362.                                                                             |  |  |  | Yes | Yes |     |    |     |     |     | Yes | Yes | Yes | Yes | Yes |
| 113 | Mietzner    | 2019 | Review                                | Mietzner, R.; Breunig, M. Causative Glaucoma Treatment: Promising Targets and Delivery Systems. <i>Drug Discovery Today</i> <b>2019</b> , <i>24</i> , 1606–1613.                                                                                                                                                                                                                                                                  |  |  |  | Yes | Yes | Yes | CT | Yes | Yes | Yes |     |     |     |     |     |
| 114 | Li          | 2013 | Precinical trial                      | Li, M.; Yasumura, D.; Ma, A.A.K.; Matthes, M.T.; Yang, H.; Nielson, G.; Huang, Y.; Szoka, F.C.; LaVail, M.M.; Diamond, M.I. Intravitreal Administration of HA-1077, a ROCK Inhibitor, Improves Retinal Function in a Mouse Model of Huntington Disease. <i>PLoS ONE</i> <b>2013</b> , <i>8</i> , doi:10.1371/journal.pone.0056026.                                                                                                |  |  |  | Yes | Yes |     |    |     |     |     | Yes | Yes | Yes | Yes | Yes |
| 115 | Mietzner    | 2020 | Precinical trial                      | Mietzner, R.; Kade, C.; Froemel, F.; Pauly, D.; Stamer, W.D.; Ohlmann, A.; Wegener, J.; Fuchshofer, R.; Breunig, M. Fasudil Loaded PLGA Microspheres as Potential Intravitreal Depot Formulation for Glaucoma Therapy. <i>Pharmaceutics</i> <b>2020</b> , <i>12</i> , 1–22, doi:10.3390/pharmaceutics12080706.                                                                                                                    |  |  |  | Yes | Yes |     |    |     |     |     | Yes | Yes | Yes | Yes | Yes |
| 116 | Kita        | 2008 | Precinical trial                      | Kita, T.; Hata, Y.; Arita, R.; Kawahara, S.; Miura, M.; Nakao, S.; Mochizuki, Y.; Enaida, H.; Goto, Y.; Shimokawa, H.; et al. Role of TGF-β in Proliferative Vitreoretinal Diseases and ROCK as a Therapeutic Target. <i>Proceedings of the National Academy of Sciences of the United States of America</i> <b>2008</b> , <i>105</i> , 17504–17509, doi:10.1073/pnas.0804054105.                                                 |  |  |  | Yes | Yes |     |    |     |     |     | Yes | Yes | Yes | Yes | Yes |
| 117 | Ahmadiieh   | 2019 | RCT                                   | Ahmadiieh, H.; Nourinia, R.; Hafezi-Moghadam, A.; Sabbaghi, H.; Nakao, S.; Zandi, S.; Yaseri, M.; Tofighi, Z.; Akbarian, S. Intravitreal Injection of a Rho-Kinase Inhibitor (Fasudil) Combined with Bevacizumab versus Bevacizumab Monotherapy for Diabetic Macular Oedema: A Pilot Randomised Clinical Trial. <i>British Journal of Ophthalmology</i> <b>2019</b> , <i>103</i> , 922–927, doi:10.1136/bjophthalmol-2018-312244. |  |  |  | Yes | Yes | CT  |    |     |     |     | Yes | Yes | Yes | Yes | Yes |
| 118 | Minami      | 2019 | Comparative retrospective study       | Minami, Y.; Song, Y. seok; Ishibazawa, A.; Omae, T.; Ro-mase, T.; ishiko, S.; Yoshida, A. Effect of Ripasudil on Diabetic Macular Edema. <i>Scientific Reports</i> <b>2019</b> , <i>9</i> , 5–9, doi:10.1038/s41598-019-40194-5.                                                                                                                                                                                                  |  |  |  | Yes | Yes |     |    |     |     |     | Yes | Yes | Yes | Yes | Yes |

|     |             |      |                   |                                                                                                                                                                                                                                                                                                                                              |     |     |     |     |     |     |
|-----|-------------|------|-------------------|----------------------------------------------------------------------------------------------------------------------------------------------------------------------------------------------------------------------------------------------------------------------------------------------------------------------------------------------|-----|-----|-----|-----|-----|-----|
| 119 | Glendenning | 2018 | Preclinical trial | Glendenning, A.; Crews, K.; Sturdivant, J.; A del.ong, M.; Kopeczynski, C.; Lin, C.-W. Sustained Release, Biodegradable PEA Implants for Intravitreal Delivery of the ROCK/PKC Inhibitor AR-13503   IOVS   ARVO Journals. Invest. Ophthalmol. Vis. Sci. <b>2018</b> , 59, 5672.                                                              | Yes | Yes | Yes | Yes | Yes | Yes |
| 120 | Ding        | 2019 | Preclinical trial | Ding, J.; Crews, K.; Carbajal, K.; Weksler, M.; Moore, L.; Carlson, E.C.; Lin, C.-W. Ocular Tissue Distribution and Duration of Release of AR-13503 Following Administration of AR-13503 Sustained Release Intravitreal Implant in Rabbits and Miniature Swine   IOVS   ARVO Journals. Invest. Ophthalmol. Vis. Sci. <b>2019</b> , 60, 5387. | Yes | Yes | Yes | Yes | Yes | Yes |

RCT: Randomized Controlled Trial; CT: Clinical Trial
